# Supplementary material for: Activin B Antagonizes RhoA Signaling to Stimulate Mesenchymal Morphology and Invasiveness of Clear Cell Renal Cell Carcinomas
Source: PubMed Central journal article supplement (PMC4208853; doi:10.1371/journal.pone.0111276), 2014-10-24
Supplement: pone.0111276.s003.pdf [file pone.0111276.s003.pdf]

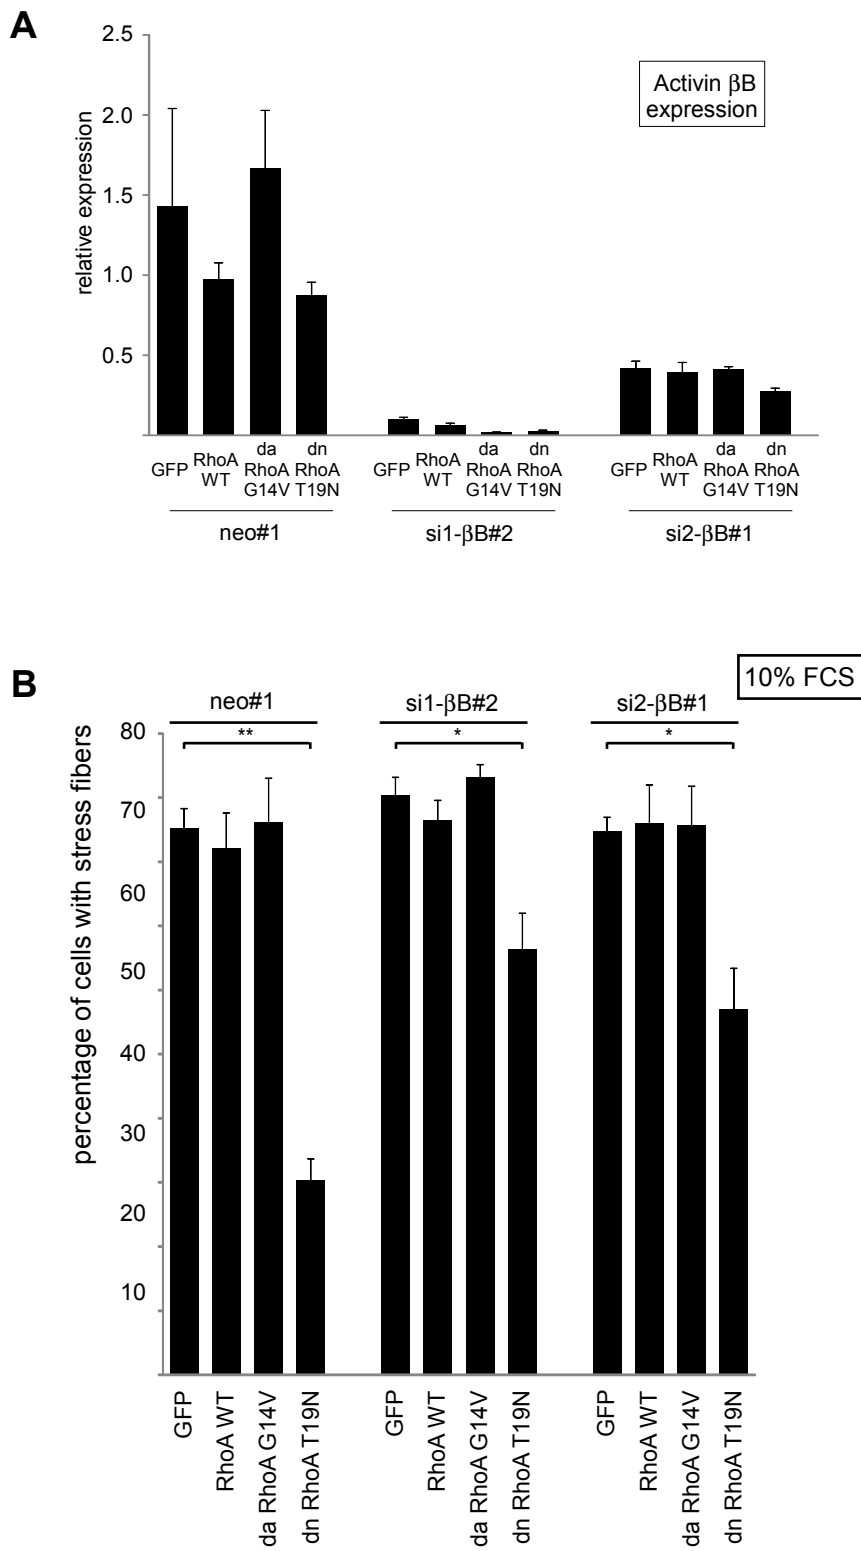

**Figure S3**
